# Supplementary material for: Two new uranyl fluoride complexes with UVIO–alkali (Na, Cs) interactions: Experimental and theoretical studies
Source: Royal Society of Chemistry journal article supplement (doi:10.1039/c3ce41261j), 2013-01-01
Supplement: c3ce41261j.pdf [file c3ce41261j.pdf]

# Two New Layered Uranyl Fluoride Complexes with U<sup>VI</sup>=O-Alkali (Na, Cs) Interactions: Experimental and Theoretical Studies

Fei Chen<sup>#</sup>, Congzhi Wang<sup>#</sup>, Weiqun Shi,<sup>\*</sup> Miao Zhang, Caiming Liu, Yuliang Zhao, and Zhifang Chai<sup>\*</sup>

## Supplementary Information

Table S1 Selected bond length in compound 1

| Bond   | Length(Å) | Bond    | Length (Å) | Bond   | Length(Å) | Bond   | Length (Å) |
|--------|-----------|---------|------------|--------|-----------|--------|------------|
| U1-O1  | 1.774(4)  | U1-O2   | 1.778(5)   | U1-O4  | 2.234(3)  | U1-O3  | 2.237(3)   |
| U1-F2  | 2.3114(3) | U1-F1   | 2.387(3)   | U1-F1  | 2.415(3)  | U1-Na1 | 3.6472(11) |
| U1-Na2 | 3.731(2)  | U1-U1   | 4.0476(7)  | U1-Na2 | 4.069(3)  | Na1-O3 | 2.272(4)   |
| Na1-O3 | 2.272(4)  | Na1-O4  | 2.353(4)   | Na1-O4 | 2.353(4)  | Na1-O2 | 2.464(5)   |
| Na1-O2 | 2.464(5)  | Na1-U1  | 3.6472(11) | Na2-O4 | 2.205(4)  | Na2-O3 | 2.282(4)   |
| Na2-F1 | 2.352(4)  | Na2-O5  | 2.375(5)   | Na2-O1 | 2.398(5)  | Na2-O5 | 2.543(6)   |
| Na2-U1 | 3.731(2)  | Na2-Na2 | 3.733(5)   | Na2-U1 | 4.069(3)  | O5-Na2 | 2.375(5)   |
| F-Na2  | 2.352(4)  | F-U1    | 2.415(3)   | F2-U1  | 2.3114(3) | O1-Na2 | 2.398(5)   |
|        |           | O2-Na1  | 2.464(5)   | O3-Na2 | 2.282(4)  |        |            |

Table S2 Selected bond angles in compound 1.

| Bond Angles | Value(deg) | Bond Angles | Value(deg) | Bond Angles | Value(deg) |
|-------------|------------|-------------|------------|-------------|------------|
| O1-U1-O2    | 177.7(2)   | O1-U1-O4    | 90.86(17)  | O2-U1-O4    | 91.47(18)  |
| O1-U1-O3    | 89.12(18)  | O2-U1-O3    | 91.67(18)  | O4-U1-O3    | 74.38(12)  |
| O1-U1-F2    | 90.03(15)  | O2-U1-F2    | 90.31(15)  | O4-U1-F2    | 77.43(9)   |
| O3-U1-F2    | 151.79(8)  | O1-U1-F1    | 86.18(17)  | O2-U1-F1    | 91.70(18)  |
| O4-U1-F1    | 150.73(12) | O3-U1-F1    | 134.56(12) | O1-U1-F1    | 90.50(16)  |
| O2-U1-F1    | 87.71(16)  | O4-U1-F1    | 144.12(11) | O3-U1-F1    | 69.79(11)  |
| F2-U1-F1    | 138.43(7)  | F1-U1-F1    | 65.10(13)  | O3-Na2-O1   | 113.81(17) |
| O3-Na1-O3   | 92.5(2)    | O3-Na1-O4   | 71.48(12)  | O3-Na1-O4   | 163.89(17) |
| O4-Na1-O4   | 124.6(2)   | O3-Na1-O2   | 89.75(15)  | O3-Na1-O2   | 85.19(15)  |
| O4-Na1-O2   | 92.97(15)  | O4-Na1-O2   | 90.43(15)  | O3-Na1-O2   | 85.19(15)  |

|           |             |            |            |            |            |
|-----------|-------------|------------|------------|------------|------------|
| O3-Na1-O2 | 89.75(15)   | O4-Na1-O2  | 90.43(15)  | O4-Na1-O2  | 92.97(15)  |
| O2-Na1-O2 | 172.7(3)    | O4-Na2-O3  | 146.66(19) | O4-Na2-F1  | 98.79(15)  |
| O3-Na2-F1 | 70.20(13)   | O4-Na2-O5  | 108.15(17) | O3-Na2-O5  | 89.58(16)  |
| F1-Na2-O5 | 152.40(17)  | O4-Na2-O1  | 96.38(17)  | F1-Na2-O1  | 87.29(16)  |
| O5-Na2-O1 | 83.93(18)   | O4-Na2-O5  | 84.74(16)  | O3-Na2-O5  | 70.17(15)  |
| F1-Na2-O5 | 108.25(17)  | O5-Na2-O5  | 80.69(18)  | O1-Na2-O5  | 164.12(19) |
| Na2-F1-U1 | 135.82(16)  | Na2-F1-U1  | 103.00(13) | U1-F1-U1   | 114.90(13) |
| U1-F2-U1  | 180.000(10) | U1-O1-Na2  | 154.2(3)   | U1-O2-Na1  | 171.0(3)   |
| U1-O3-Na1 | 107.95(15)  | U1-O3-Na2  | 111.30(15) | Na1-O3-Na2 | 133.92(18) |
| Na2-O4-U1 | 139.63(19)  | Na2-O4-Na1 | 108.25(17) | U1-O4-Na1  | 105.31(15) |
|           |             | Na2-O5-Na2 | 98.72(18)  |            |            |

Table S3 Selected bond length in compound 2.

| Bond   | Length(Å) | Bond   | Length(Å) | Bond   | Length(Å) | Bond   | Length(Å) |
|--------|-----------|--------|-----------|--------|-----------|--------|-----------|
| U1-O1  | 1.77 (1)  | U1-O2  | 1.76(1)   | U1-F1  | 2.266(3)  | U1-F2  | 2.314(6)  |
| U1-F3  | 2.326(5)  | U2-O3  | 1.74(1)   | U2-O8  | 1.78(1)   | U2-F2  | 2.318(6)  |
| U2-F3  | 2.309(5)  | U2-F4  | 2.267(2)  | Cs1-F2 | 3.367(7)  | Cs1-F3 | 3.144(7)  |
| Cs1-O3 | 3.632(4)  | Cs1-O1 | 3.297(4)  | Cs1-O8 | 3.211(5)  | Cs1-O2 | 3.654(6)  |

Table S4 Selected bond angle in compound 2.

| Bond Angle | Value(deg) | Bond Angle | Value(deg) | Bond Angle | Value(deg) |
|------------|------------|------------|------------|------------|------------|
| F2-U2-F3   | 70.7(2)    | F2-U2-F4   | 70.7(3)    | F2-U2-O3   | 88.3(4)    |
| F2-U2-O8   | 92.1(4)    | F2-U2-F2   | 140.9(2)   | F2-U2-F3   | 148.3(2)   |
| F3-U2-F4   | 141.0(3)   | F3-U2-O3   | 90.7(4)    | F3-U2-O8   | 88.5(3)    |
| F3-U2-F2   | 148.3(2)   | F3-U2-F3   | 77.7(2)    | F4-U2-O3   | 92.8(4)    |
| F4-U2-O8   | 88.3(4)    | F4-U2-F2   | 70.7(3)    | F4-U2-F3   | 141.0(3)   |
| O3-U2-O8   | 179.0(4)   | O3-U2-F2   | 88.3(4)    | O3-U2-F3   | 90.7(4)    |
| O8-U2-F2   | 92.1(4)    | O8-U2-F3   | 88.5(3)    | F2-U2-F3   | 70.7(2)    |
| F1-U1-O1   | 91.4(4)    | F1-U1-O2   | 89.5(4)    | F1-U1-F3   | 70.6(3)    |
| F1-U1-F2   | 141.5(3)   | F1-U1-F2   | 141.5(3)   | F3-U1-O1   | 88.8(4)    |
| F3-U1-O2   | 91.5(4)    | F3-U1-F3   | 141.0(2)   | F3-U1-F2   | 147.9(2)   |
| F3-U1-F2   | 71.0(2)    | O1-U1-O2   | 179.0(5)   | O1-U1-F3   | 88.8(4)    |
| O1-U1-F2   | 89.7(4)    | O1-U1-F2   | 89.7(4)    | O2-U1-F3   | 91.5(4)    |
| O2-U1-F2   | 89.5(4)    | O2-U1-F2   | 89.5(4)    | F3-U1-F2   | 71.0(2)    |

---

|           |          |            |          |           |          |
|-----------|----------|------------|----------|-----------|----------|
| F3-U1-F2  | 147.9(2) | F2-U1-F2   | 77.0(2)  | U1-F1-U1  | 146.2(5) |
| Cs1-F2-U2 | 97.5(2)  | Cs1-F2-Cs1 | 115.7(2) | Cs1-F2-U1 | 104.6(2) |
| U2-F2-Cs1 | 91.3(2)  | U2-F2-U1   | 156.3(3) | Cs1-F2-U1 | 87.1(2)  |
| Cs1-F3-U2 | 104.0(2) | Cs1-F3-U1  | 100.4(2) | U2-F3-U1  | 154.8(3) |
| U2-F4-U2  | 155.0(5) | Cs1-O3-U2  | 101.4(4) | F2-U2-F3  | 70.7(2)  |
| F2-U2-O3  | 88.3(4)  | F2-U2-O8   | 92.1(4)  | F2-U2-F2  | 140.9(2) |
| F2-U2-F4  | 70.7(3)  | F3-U2-O3   | 90.7(4)  | F3-U2-O8  | 88.5(3)  |
| F3-U2-F2  | 148.3(2) | F3-U2-F3   | 77.7(2)  | F3-U2-F4  | 141.0(3) |
| O3-U2-O8  | 179.0(4) | O3-U2-F2   | 88.3(4)  | O3-U2-F3  | 90.7(4)  |
| O3-U2-F4  | 92.8(4)  | O8-U2-F2   | 92.1(4)  | O8-U2-F3  | 88.5(3)  |
| O8-U2-F4  | 88.3(4)  | F2-U2-F3   | 70.7(2)  | F2-U2-F4  | 70.7(3)  |
| F3-U2-F4  | 141.0(3) | F1-U1-F3   | 70.6(3)  | F1-U1-O1  | 91.4(4)  |
| F1-U1-O2  | 89.5(4)  | F1-U1-F3   | 70.6(3)  | F1-U1-F2  | 141.5(3) |
| F1-U1-F2  | 141.5(3) | F3-U1-O1   | 88.8(4)  | F3-U1-O2  | 91.5(4)  |
| F3-U1-F3  | 141.0(2) | F3-U1-F2   | 147.9(2) | F3-U1-F2  | 71.0(2)  |
| O1-U1-O2  | 179.0(5) | O1-U1-F3   | 88.8(4)  | O1-U1-F2  | 89.7(4)  |
| O1-U1-F2  | 89.7(4)  | O2-U1-F3   | 91.5(4)  | O2-U1-F2  | 89.5(4)  |
| O2-U1-F2  | 89.5(4)  | F3-U1-F2   | 71.0(2)  | F3-U1-F2  | 147.9(2) |
| F2-U1-F2  | 77.0(2)  | U1-F3-U2   | 154.8(3) | U2-F2-U1  | 156.3(3) |
| F2-U1-O2  | 89.5(4)  | F2-U1-O2   | 89.5(4)  |           |          |

---

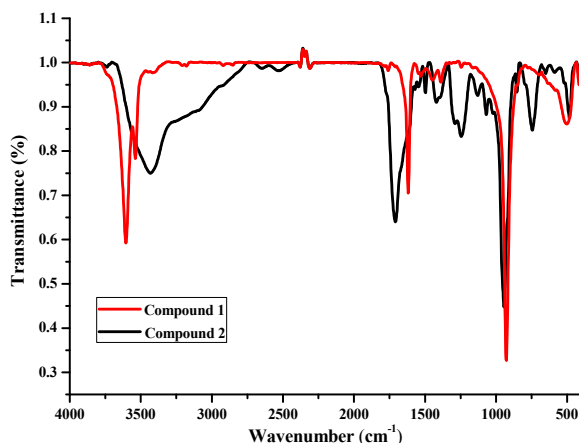

Figure S1. IR spectra of compounds 1 and 2.

The IR spectra of inorganic compounds are always difficult to identify because there is very little reference in the literature. For simple ionic compounds, such as sodium chloride, potassium bromide, and calcium fluoride, etc, the only vibrations originate from lattice vibrations, in which the individual ions undergo translational oscillations. The resulting spectral bands are broad and are responsible for the long wave-length cutoff in transmission.<sup>1</sup> For somewhat complicated inorganic compounds 1 and 2, their IR spectra are shown in figure S1. The peaks positioned at 750, 944 and 928  $\text{cm}^{-1}$  are assigned to the symmetric and asymmetric stretching modes of the uranyl cation in 1 and 2, respectively. The peaks resolved at 483 and 501  $\text{cm}^{-1}$  can be assigned to M-F stretches according to the literature,<sup>1,2</sup> Besides, the peaks of compound 2 at 3605 and 3538  $\text{cm}^{-1}$  are assigned to O-H stretches of the hydroxide. The peaks of compound 1 at 3432  $\text{cm}^{-1}$  are assigned to absorption band of water in crystal. The broad band from 1200-1600  $\text{cm}^{-1}$  imply the influence of water resulting in certain changes in structures, this judgement agrees with the literature as well.<sup>2</sup>

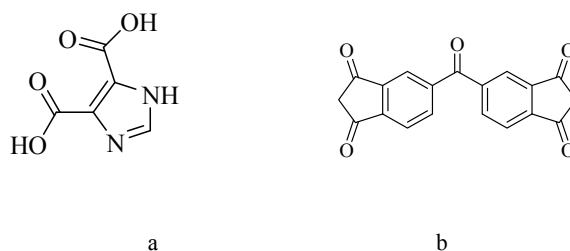

Figure S2. (a) Structure of 1H-imidazole-4,5-dicarboxylic acid (H3IDC) and (b) 3,3',4,4'-benzophenonetetracarboxylic dianhydride (3,3',4,4'-BTDA)

#### REFERENCES

- (1) Miller, F. A.; Wilkins, C. H. *Anal. Chem.* 1952, 24, 1253.
- (2) (a) Soga, T.; Ohwada, K.; Iwasaki, M. *J Chem. Phys.* 1974, 61, 1990-1996. (b) Chen, R.; Li, W. H.; Zhang, Q. Y. *Spectrosc. Spect. Anal.* 1996, 16, 41.
